# Supplementary material for: Human A53T α-Synuclein Causes Reversible Deficits in Mitochondrial Function and Dynamics in Primary Mouse Cortical Neurons
Source: PLoS One. 2013 Dec 31;8(12):e85815. doi: 10.1371/journal.pone.0085815 (PMC3877382; doi:10.1371/journal.pone.0085815)
Supplement: Table S2 — Parameters of mitochondrial shape at 13-14DIV. (XLSX) [file pone.0085815.s007.xlsx]

## Sheet: Table2
13-14DIV	Experiment #1		Experiment #2		Experiment #3
Genotype	wt	A53T	wt	A53T	wt	A53T
Length (μm)	2.358±0.100	2.276±0.104	1.958±0.005	1.959±0.005	1.199±0.006	1.212±0.007
Circularity	0.685±0.013	0.620±0.016	0.728±0.001	0.737±0.001	0.767±0.002	0.807±0.002
Roundness	0.568±0.014	0.531±0.017	0.607±0.001	0.600±0.001	0.568±0.001	0.600±0.002
Aspect ratio	2.275±0.097	2.226±0.083	1.849±0.003	1.875±0.003	2.011±0.007	1.906±0.008
n	283	150	32455	35018	16895	11381
